# Supplementary material
Source: Research Square preprint supplement (doi:10.21203/rs.3.rs-9447729/v1)
Supplement: Supplementary file 1 [file 976199aa66afdd37010fb3ec.docx]

| Table 1 Characteristics of the study cohort | |  |  |  |
| --- | --- | --- | --- | --- |
| Characteristics | Total (n = 90) |
| Age (years)  Mean ± SD | 61.6 ± 9.5 |
| Gender |  |
| Male | 60 (66.7) |
| Female | 30 (33.3) |
| Tumor location |  |
| Intrahepatic | 52 (57.8) |
| Extrahepatic | 32 (35.6) |
| Combined | 6 (6.6) |
| T stage |  |
| T1 | 6 (6.6) |
| T2 | 39 (43.3) |
| T3 | 22 (24.5) |
| T4 | 23 (25.6) |
| Presence of regional lymph node metastasis (N) |  |
| Yes | 55 (61.1) |
| No | 35 (38.9) |
| Presence of extraskeletal distant metastasis (M) |  |
| Yes | 46 (51.1) |
| No | 44 (48.9) |
| Presence of bone metastasis |  |
| Yes | 44 (48.9) |
| No | 46 (51.1) |
| Indication of bone scan |  |
| Staging | 67 (74.4) |
| Surveillance | 23 (25.6) |
| aBSI (%) |  |
| Mean ± SD  Range | 0.6 ± 2.3  0.0-21.2 |

| Table 2 Univariate Cox proportional hazards analysis for association between variables and overall survival | | |  |  |
| --- | --- | --- | --- | --- |
| Variables | Univariate analysis | |
| HR (95% CI) | p-value |
| Age |  |  |
| ≤60 years | Ref. |  |
| >60 years | 1.25 (0.81-1.92) | 0.316 |
| Tumor location |  |  |
| iCCA or eCCA | Ref. |  |
| Combined | 1.67 (0.72-3.85) | 0.231 |
| T stage |  |  |
| T1-T2 | Ref. |  |
| T3-T4 | 1.18 (0.78-1.81) | 0.436 |
| Presence of regional lymph node metastasis |  |  |
| No | Ref. |  |
| Yes | 1.00 (0.65-1.53) | 0.986 |
| Presence of extraskeletal distant metastasis |  |  |
| No | Ref. |  |
| Yes | 1.89 (1.23-2.90) | 0.004 |
| aBSI |  |  |
| ≤1% | Ref. |  |
| >1% | 2.58 (1.41-4.73) | 0.002 |

| Table 3 Multivariate Cox proportional hazards analysis for association between variables and overall survival | | | |
| --- | --- | --- | --- |
| Variables | Multivariate analysis | |
| Adjusted HR (95% CI) | p-value |
| Presence of extraskeletal distant metastasis |  |  |
| No | Ref. |  |
| Yes | 1.88 (1.22-2.89) | 0.004 |
| aBSI |  |  |
| ≤1% | Ref. |  |
| >1% | 2.55 (1.39-4.69) | 0.003 |
